# Supplementary material for: Development of a radiomics model to discriminate ammonium urate stones from uric acid stones in vivo: A remedy for the diagnostic pitfall of dual-energy computed tomography
Source: PubMed Central journal article supplement — Chin Med J (Engl). 2023 Nov 23;137(9):1095–104. doi: 10.1097/CM9.0000000000002866 (PMC11062676; doi:10.1097/cm9.0000000000002866), 2023-11-23
Supplement: cm9-137-1095-s001.pdf [file cm9-137-1095-s001.pdf]

# Supplementary Material

|                                                                                                                                              |    |
|----------------------------------------------------------------------------------------------------------------------------------------------|----|
| SUPPLEMENTARY METHODS .....                                                                                                                  | 2  |
| 1. <i>The image processing and interpretation of DECT in diagnosis of uric acid stone</i> .....                                              | 2  |
| 2. <i>Detailed description of the LASSO algorithm</i> .....                                                                                  | 3  |
| 3. <i>Decision curve analysis</i> .....                                                                                                      | 3  |
| SUPPLEMENTARY TABLES .....                                                                                                                   | 5  |
| Supplementary Table 1. The CT acquisition parameters. ....                                                                                   | 5  |
| Supplementary Table 2. Extracted radiomics features. ....                                                                                    | 6  |
| Supplementary Table 3. R packages used in our study. ....                                                                                    | 8  |
| Supplementary Table 4. Baseline characteristics of the patients who underwent dual-energy CT. ....                                           | 9  |
| Supplementary Table 5. Baseline characteristics of the patients used for model construction and validation. ....                             | 10 |
| Supplementary Table 6. Stratified analysis of the association between the radiomics signature and stone types in all enrolled patients. .... | 11 |
| SUPPLEMENTARY FIGURES.....                                                                                                                   | 12 |
| Supplementary Figure 1. The chemical structural formulas of uric acid and ammonium urate. ....                                               | 12 |
| Supplementary Figure 2. Model comparisons using ROC curve analyses.....                                                                      | 13 |
| Supplementary Figure 3. Sankey diagram presents the reclassification of patients diagnosed by DECT and the radiomics model. ....             | 14 |
| Supplementary Figure 4. The recommended diagnostic workflow for the individualized use of our proposed radiomics model. ....                 | 15 |

## SUPPLEMENTARY METHODS

### *1. The image processing and interpretation of DECT in diagnosis of uric acid stone*

All patients underwent dual-energy CT (DECT) with a dual-source dual-energy SOMATOM Definition Flash machine (Siemens Healthcare, Forchheim, Germany). The patient was positioned supine on the CT table with an area of interest being the abdomen. Dual-energy scan was performed using the scanner which acquires the images at 100/140 kVp in two different planes by the two tubes of the machine angled at 90° to each other.

After the image acquisition, the dual energy dataset was subjected to preprogrammed dual energy algorithmic software and new datasets acquired which were analyzed by syngo.via software (Siemens Healthcare, Forchheim, Germany). The stone marker was located on the desired stone which revealed various dual energy parameters of the stone, such as HU values at 100/Sn140/fusion image and dual energy ratio, which were used to classify the stones into uric acid stones and non-uric acid stones. On the DECT images, uric acid stone is visualized as red, while non-uric acid stone is visualized as blue (prediction result). An example case is shown in the figures below.

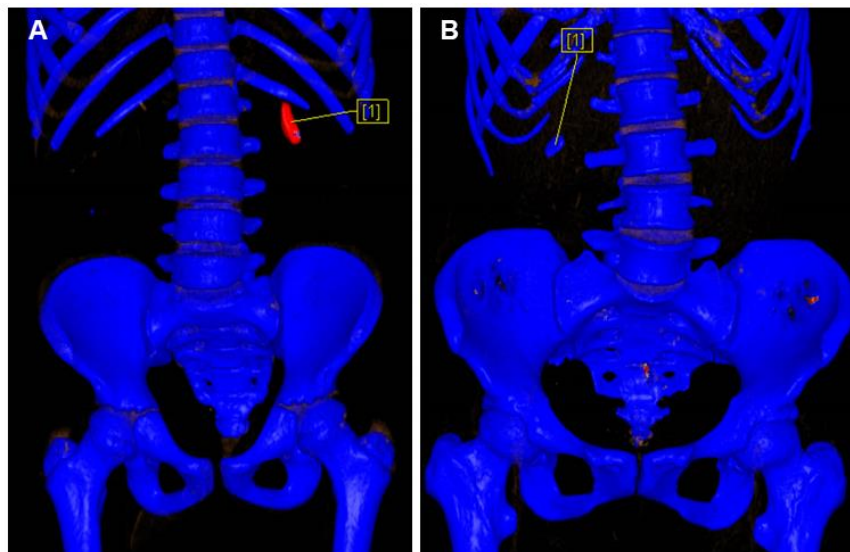

## ***2. Detailed description of the LASSO algorithm***

LASSO is a powerful method for regression with high dimensional predictors. In our study, the LASSO method was combined with a logistic regression model for analysis of the urinary stone types, which could select the most important predictive features from the training set. This method minimizes a log partial likelihood subject to the sum of the absolute values of the parameters being bounded by a constant:

$$\hat{\beta} = \operatorname{argmin} \ell(\beta), \text{ subject to } \sum |\beta_j| \leq s$$

where,  $\hat{\beta}$  is the obtained parameters,  $\ell(\beta)$  is the log partial likelihood of the logistic regression model,  $s > 0$  is a constant.

The LASSO method can be used for feature reduction and selection by shrinking coefficients and forcing certain coefficients to be set to zero through absolute constraint <sup>1</sup>. In this study, the standardized constraint parameter  $s$  was set as 0.063, and 14 nonzero coefficients ( $\hat{\beta}$ ) were selected by LASSO.

## ***3. Decision curve analysis***

In the study, the decision curve analysis (DCA) method was used to estimate the clinical usefulness of the presented radiomics model. The DCA algorithm evaluates prediction models by calculating the range of threshold probabilities in which a prediction or prognostic model is clinically useful. DCA is a comprehensive method for assessing and comparing different diagnostic and prognostic models. The theory of DCA can be illustrated by the equation below:

$$\frac{a - c}{d - b} = \frac{1 - P_t}{P_t}$$

where  $d - b$  represents the influence of unnecessary treatment. If treatment is directed by a prediction model,  $d - b$  is the harm related to a false-positive result compared with a true-negative result. Inversely,  $a - c$  represents the consequence of rejecting beneficial treatment, in other words, the harm from a false-negative result compared with a true-positive result.  $P_t$  represents where the expected benefit of treatment is equal to the expected benefit of refraining from treatment<sup>2,3</sup>.

## REFERENCES

1. Tibshirani R. Regression shrinkage and selection via the lasso: a retrospective. *J R Stat Soc Series B Stat Methodol* 2011; 73: 273-282. doi: 10.1111/j.1467-9868.2011.00771.x.
2. Balachandran VP, Gonen M, Smith JJ, DeMatteo RP. Nomograms in oncology: more than meets the eye. *Lancet Oncol* 2015; 16: e173-180. doi: 10.1016/s1470-2045(14)71116-7.
3. Vickers AJ, Elkin EB. Decision curve analysis: a novel method for evaluating prediction models. *Med Decis Making* 2006; 26: 565-574. doi: 10.1177/0272989x06295361.

## SUPPLEMENTARY TABLES

**Supplementary Table 1.** The CT acquisition parameters.

|                                                          | <b>CT mode</b>                     | <b>Manufacturer</b>                                       | <b>Tube voltage (kV)</b>           | <b>Slice thickness (mm)</b> |
|----------------------------------------------------------|------------------------------------|-----------------------------------------------------------|------------------------------------|-----------------------------|
| <b>The First People's Hospital of Kashgar Prefecture</b> | <b>Dual-energy CT</b>              | SOMATOM Definition Flash<br>(Siemens Healthcare, Germany) | 100/140<br>(low/high tube voltage) | 1.5                         |
|                                                          | <b>Traditional non-contrast CT</b> | GE Optima CT680<br>(GE Healthcare, USA)                   | 110                                | 1.25                        |
|                                                          |                                    | SOMATOM Emotion 16 eco<br>(Siemens Healthcare, Germany)   | 110                                | 1.5                         |
| <b>Sun Yat-sen Memorial Hospital</b>                     | <b>Traditional non-contrast CT</b> | GE Discovery CT750 HD<br>(GE Healthcare, USA)             | 120                                | 1.25                        |
|                                                          |                                    | SOMATOM Sensation 64 eco<br>(Siemens Healthcare, Germany) | 120                                | 1.0                         |

**Supplementary Table 2.** Extracted radiomics features.

| Group                               | Subgroup | Radiomics Features                                                                                                                                                                                                                                                                                                                                                                                                                                                                                            |
|-------------------------------------|----------|---------------------------------------------------------------------------------------------------------------------------------------------------------------------------------------------------------------------------------------------------------------------------------------------------------------------------------------------------------------------------------------------------------------------------------------------------------------------------------------------------------------|
| First-order statistics features     |          | Interquartile Range, Skewness, Uniformity, Median, Energy, Robust Mean Absolute Deviation, Mean Absolute Deviation, Total Energy, Maximum, Root Mean Squared, 90 <sup>th</sup> Percentile, Minimum, Entropy, Range, Variance, 10 <sup>th</sup> Percentile, Kurtosis, Mean                                                                                                                                                                                                                                     |
| Shape-based features                |          | Voxel Volume, Mesh Volume, Surface Volume Ratio, Maximum 3D Diameter, Maximum 2D Diameter Slice, Sphericity, Minor Axis, Elongation, Major Axis, Surface Area, Flatness, Least Axis, Maximum 2D Diameter Column, Maximum 2D Diameter Row                                                                                                                                                                                                                                                                      |
| Statistics-based textural features  | GLCM     | Joint Average, Sum Average, Joint Entropy, Cluster Shade, Maximum Probability, Inverse Difference Moment Normalized, Joint Energy, Contrast, Difference Entropy, Inverse Variance, Difference Variance, Inverse Difference Normalized, Inverse Difference Moment, Correlation, Autocorrelation, Sum Entropy, Maximal Correlation Coefficient, Sum Squares, Cluster Prominence, Informal Measure of Correlation 2, Informal Measure of Correlation 1, Difference Average, Inverse Difference, Cluster Tendency |
|                                     | GLRLM    | Short Run Low Gray Level Emphasis, Gray Level Variance, Low Gray Level Run Emphasis, Gray Level Non-Uniformity Normalized, Run Variance, Gray Level Non-Uniformity, Long Run Emphasis, Short Run High Gray Level Emphasis, Run Length Non-Uniformity, Short Run Emphasis, Long Run High Gray Level Emphasis, Run Percentage, Long Run Low Gray Level Emphasis, Run Entropy, High Gray Level Run Emphasis, Run Length Non-Uniformity Normalized                                                                |
|                                     | GLSZM    | Gray Level Variance, Zone Variance, Gray Level Non-Uniformity Normalized, Size Zone Non-Uniformity Normalized, Size Zone Non-Uniformity, Gray Level Non-Uniformity, Large Area Emphasis, Small Area High Gray Level Emphasis, Zone Percentage, Large Area Low Gray Level Emphasis, Large Area High Gray Level Emphasis, High Gray Level Zone Emphasis, Small Area Emphasis, Low Gray Level Zone Emphasis, Zone Entropy, Small Area Low Gray Level Emphasis                                                    |
|                                     | GLDM     | Gray Level Variance, High Gray Level Emphasis, Dependence Entropy, Dependence Non-Uniformity, Gray Level Non-Uniformity, Small Dependence Emphasis, Small Dependence High Gray Level Emphasis, Dependence Non-Uniformity Normalized, Large Dependence Emphasis, Large Dependence Low Gray Level Emphasis, Dependence Variance, Large Dependence High Gray Level Emphasis, Small Dependence Low Gray Level Emphasis, Low Gray Level Emphasis                                                                   |
|                                     | NGTDM    | Coarseness, Complexity, Strength, Contrast, Business                                                                                                                                                                                                                                                                                                                                                                                                                                                          |
| Wavelet features <sup>*†</sup>      |          | wavelet(LLL)_x, wavelet(LLH)_x, wavelet(LHL)_x, wavelet(LHH)_x, wavelet(HLL)_x, wavelet(HLH)_x, wavelet(HHL)_x, wavelet(HHH)_x                                                                                                                                                                                                                                                                                                                                                                                |
| LoG filtered features <sup>**</sup> |          | LoG( $\sigma=1$ )_x, LoG( $\sigma=2$ )_x, LoG( $\sigma=3$ )_x, LoG( $\sigma=4$ )_x                                                                                                                                                                                                                                                                                                                                                                                                                            |

\* x denotes the first-order statistics features and statistics-based textural features listed above.

† For the wavelet filter, each image was filtered using either a high-bandpass filter or a low-bandpass filter in the x, y, and z directions, yielding 8 different combinations of decompositions. The value in brackets indicates the filters (H: High-pass filter, L: Low-pass filter) applied in the x, y, and z directions.

†For the LoG filter, images were filtered using a 3D LoG filter implemented in SimpleITK and by changing sigma values to 4.0, 3.0, 2.0, and 1.0 mm, yielding another 4 derived images. The value in brackets indicates the filter width used for the Gaussian kernel.

Detailed information about the feature names and mathematical formulas can be obtained from the *pyradiomics* documentation available at <http://pyradiomics.readthedocs.io/en/latest>.

**Abbreviations:** LoG: Laplacian of Gaussian; GLCM: Gray Level Cooccurrence Matrix; GLRLM: Gray Level Run Length Matrix; GLSZM: Gray Level Size Zone Matrix; GLDM: Gray Level Dependence Matrix; NGTDM, neighboring gray tone difference matrix.

**Supplementary Table 3.** R packages used in our study.

| <b>Statistical analysis</b>                                                            | <b>R package</b>       |
|----------------------------------------------------------------------------------------|------------------------|
| LASSO logistic regression                                                              | glmnet                 |
| ROC curves                                                                             | pROC                   |
| Logistic regression, nomogram construction, and calibration plot                       | rms                    |
| Collinearity diagnosis                                                                 | car                    |
| Hosmer-Lemeshow test                                                                   | vcdExtra               |
| Decision curve analysis                                                                | dca.R                  |
| Net reclassification improvement (NRI) and integrated discrimination improvement (IDI) | nricens<br>PredictABEL |



**Supplementary Table 4.** Baseline characteristics of the patients who underwent dual-energy CT.

| <b>Characteristic</b>        |             |
|------------------------------|-------------|
| <b>Age, years</b>            |             |
| Median (Interquartile range) | 27 (19, 42) |
| <b>Sex</b>                   |             |
| Male                         | 135 (75.8)  |
| Female                       | 43 (24.2)   |
| <b>Number of stones</b>      |             |
| Single                       | 38 (21.3)   |
| Multiple                     | 140 (78.7)  |
| <b>Stone location</b>        |             |
| Kidney                       | 148 (83.2)  |
| Ureter                       | 23 (12.9)   |
| Bladder or Urethra           | 7 (3.9)     |
| <b>Stone composition</b>     |             |
| Uric acid                    | 30 (16.9)   |
| Ammonium urate               | 21 (11.8)   |
| Calcium oxalate              | 127 (71.3)  |
| <b>DECT diagnosis result</b> |             |
| Uric acid                    | 41 (23.0)   |
| Non-uric acid                | 137 (77.0)  |

Data are presented as No. (%) unless indicated otherwise.

**Supplementary Table 5.** Baseline characteristics of the patients used for model construction and validation.

| <b>Characteristic</b>               | <b>Training set (n = 93)</b> | <b>Internal validation set (n = 40)</b> | <b>External validation set (n = 109)</b> |
|-------------------------------------|------------------------------|-----------------------------------------|------------------------------------------|
| <b>Age, years</b>                   |                              |                                         |                                          |
| Median (Interquartile range)        | 32 [17, 49]                  | 38.5 [21, 56]                           | 56 [49, 66]                              |
| <b>Sex</b>                          |                              |                                         |                                          |
| Male                                | 65 (70)                      | 30 (75)                                 | 67 (61.5)                                |
| Female                              | 28 (30)                      | 10 (25)                                 | 42 (38.5)                                |
| <b>Number of stones</b>             |                              |                                         |                                          |
| Single                              | 35 (38)                      | 14 (35)                                 | 23 (21.1)                                |
| Multiple                            | 58 (62)                      | 26 (65)                                 | 86 (78.9)                                |
| <b>Stone location</b>               |                              |                                         |                                          |
| Kidney                              | 70 (75)                      | 29 (73)                                 | 82 (75.2)                                |
| Ureter                              | 12 (13)                      | 6 (15)                                  | 17 (15.6)                                |
| Bladder or Urethra                  | 11 (12)                      | 5 (12)                                  | 10 (9.2)                                 |
| <b>Urine white blood cell count</b> |                              |                                         |                                          |
| < 100 per $\mu$ l                   | 36 (39)                      | 18 (45)                                 | 65 (59.6)                                |
| $\geq$ 100 per $\mu$ l              | 57 (61)                      | 22 (55)                                 | 44 (40.4)                                |
| <b>Urine nitrite</b>                |                              |                                         |                                          |
| Negative                            | 67 (72)                      | 30 (75)                                 | 101 (92.7)                               |
| Positive                            | 26 (28)                      | 10 (25)                                 | 8 (7.3)                                  |
| <b>Urine pH</b>                     |                              |                                         |                                          |
| Median (Interquartile range)        | 5.5 [5.5, 6.0]               | 5.5 [5.0, 6.0]                          | 5.5 [5.5, 6.0]                           |
| <b>Urine culture</b>                |                              |                                         |                                          |
| Positive                            | 27 (29)                      | 5 (13)                                  | 14 (12.8)                                |
| Negative                            | 66 (71)                      | 35 (87)                                 | 95 (87.2)                                |
| <b>Stone composition</b>            |                              |                                         |                                          |
| Ammonium urate                      | 47 (51)                      | 17 (43)                                 | 20 (18.3)                                |
| Uric acid                           | 46 (49)                      | 23 (57)                                 | 89 (81.7)                                |

Data are presented as No. (%) unless indicated otherwise.

**Supplementary Table 6.** Stratified analysis of the association between the radiomics signature and stone types in all enrolled patients.

|                              | Subgroups          | Radiomics score         |                       | Z      | P       |
|------------------------------|--------------------|-------------------------|-----------------------|--------|---------|
|                              |                    | Ammonium urate stones   | Uric acid stones      |        |         |
| Sex                          | Male               | -0.860 (-1.019, -0.252) | 1.310 (0.728, 2.043)  | -8.872 | < 0.001 |
|                              | Female             | -0.394 (-1.060, 0.098)  | 1.474 (0.675, 1.858)  | -5.380 | < 0.001 |
| Stone location               | Kidney             | -0.623 (-0.997, -0.062) | 1.372 (0.708, 1.972)  | -8.638 | < 0.001 |
|                              | Ureter             | -0.950 (-1.463, -0.184) | 1.236 (0.650, 1.665)  | -4.193 | < 0.001 |
|                              | Bladder or Urethra | -0.998 (-1.030, -0.955) | 1.737 (1.061, 2.062)  | -4.015 | < 0.001 |
| Number of stones             | Single             | -0.678 (-1.064, -0.267) | 1.300 (0.736, 1.882)  | -6.750 | < 0.001 |
|                              | Multiple           | -0.691 (-1.007, -0.029) | 1.372 (0.525, 1.980)  | -7.870 | < 0.001 |
| Urine white blood cell count | < 100              | -0.610 (-1.186, -0.010) | 1.483 (0.734, 2.029)  | -5.081 | < 0.001 |
|                              | ≥ 100              | -0.743 (-1.014, -0.166) | 1.300 (0.461, 1.765)  | -7.847 | < 0.001 |
| Urine nitrite                | Negative           | -0.684 (-1.008, -0.145) | 1.431 (0.752, 1.974)  | -8.898 | < 0.001 |
|                              | Positive           | -0.674 (-1.066, -0.109) | 0.592 (-0.164, 1.680) | -4.106 | < 0.001 |
| Urine culture                | Negative           | -0.802 (-1.141, -0.187) | 1.337 (0.722, 1.964)  | -8.989 | < 0.001 |
|                              | Positive           | -0.411 (-0.891, -0.062) | 1.391 (0.003, 2.007)  | -4.354 | < 0.001 |

Radiomics scores are shown as medians (interquartile ranges).

Z and P values were derived from the Mann–Whitney U tests.

## SUPPLEMENTARY FIGURES

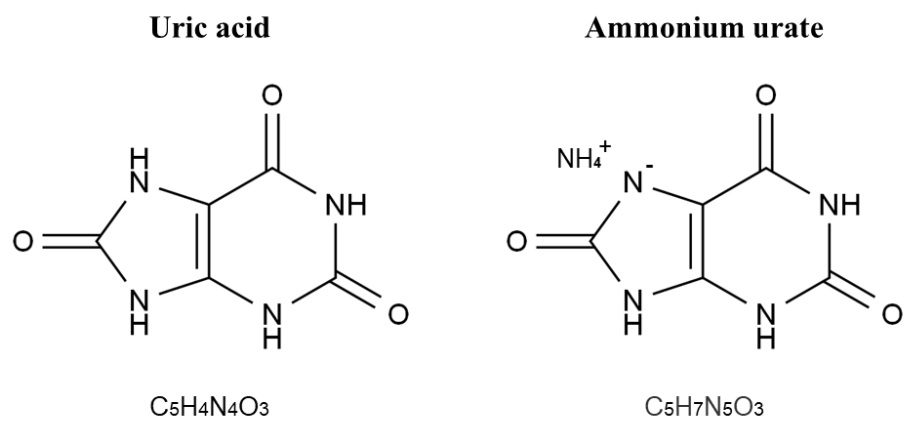

**Supplementary Figure 1.** The chemical structural formulas of uric acid and ammonium urate.

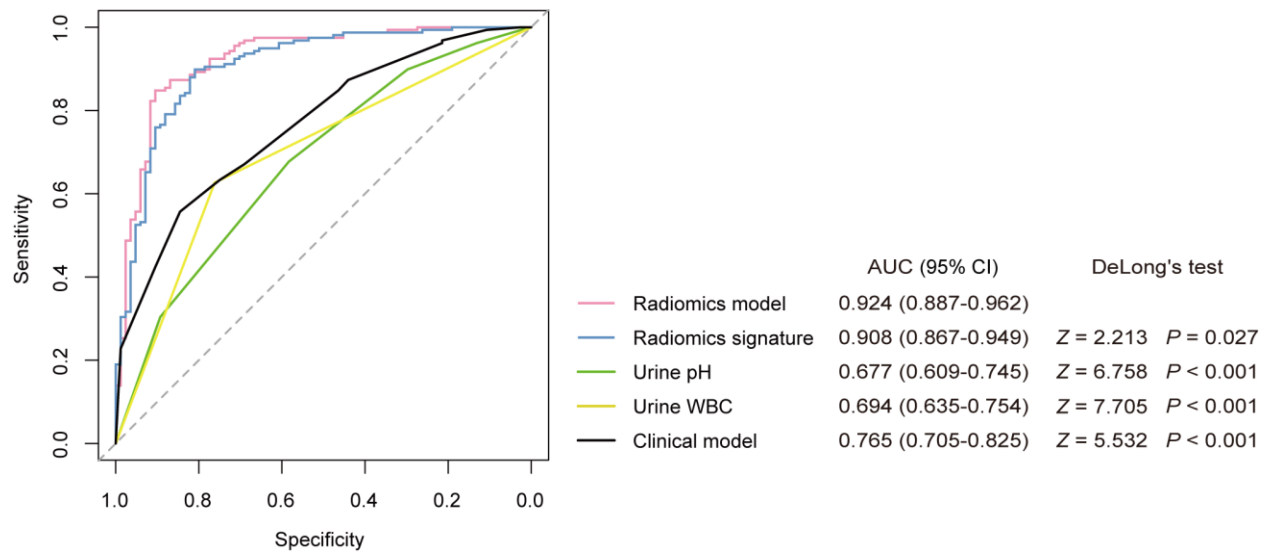

**Supplementary Figure 2.** Model comparisons using ROC curve analyses.

ROC curves comparing the predictive performance of the radiomics model with each selected predictor and the clinical model in all enrolled patients.

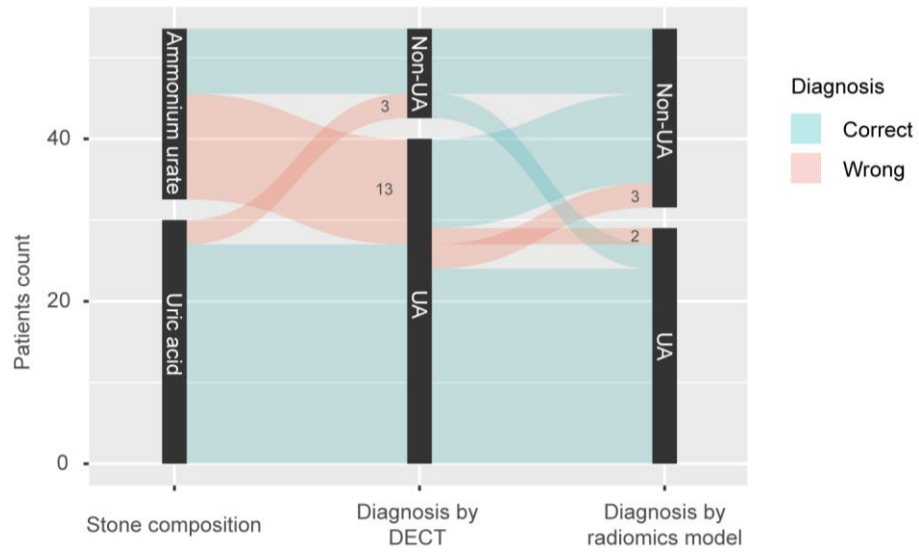

**Supplementary Figure 3.** Sankey diagram presents the reclassification of patients diagnosed by DECT and the radiomics model.

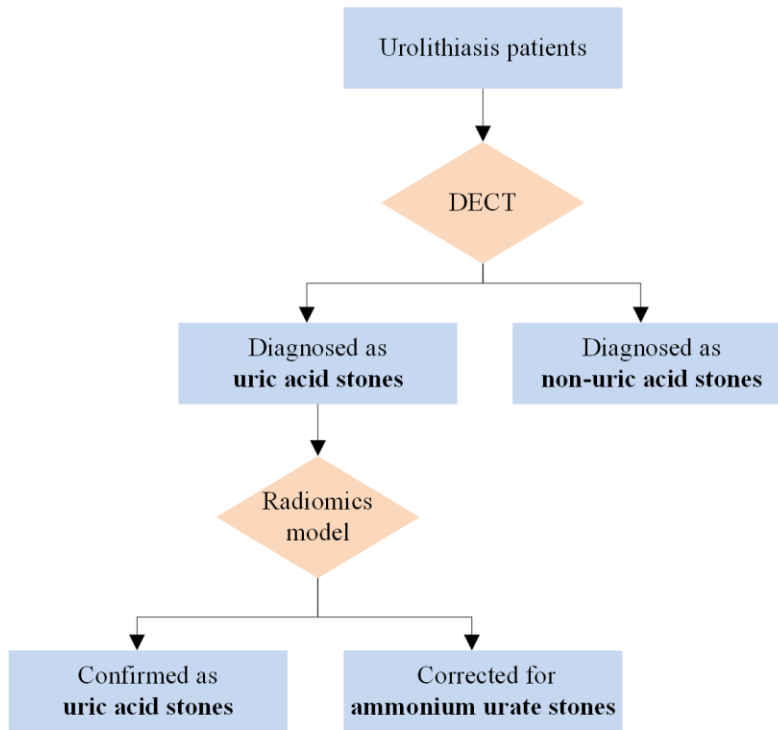

**Supplementary Figure 4.** The recommended diagnostic workflow for the individualized use of our proposed radiomics model.
